# Supplementary material for: An accurate and cost-effective alternative method for measuring cell migration with the circular wound closure assay
Source: Oxford University Press journal article supplement (doi:10.1042/bsr20180698), 2018-09-19
Supplement: bsr20180698_supp1.pdf [file bsr20180698_supp1.pdf]

351    **10    Supplementary Figures**

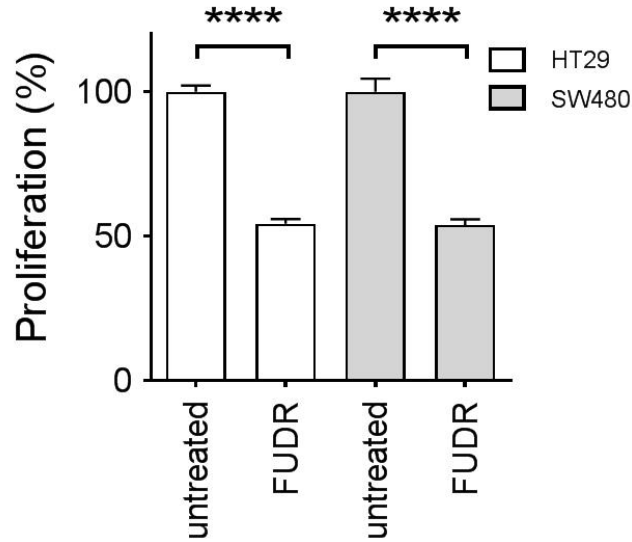

352    **Supplementary Figure 1: Analyses of proliferation with and without mitotic inhibitor FUDR.**

353    For the proliferation assay, cells were plated at  $10^5$  cells/ml in a flat-bottom 96-well plate in 2%  
 354    serum DMEM culture medium with and without 100ng/mL FUDR for 24 hours. Four images were  
 355    acquired for each treatment (one image per well), standardized with XnConvert software, and used to  
 356    count the total numbers of individual cells in each field of view. FUDR (100ng/mL) significantly  
 357    reduced cell proliferation measured at 24 hours in HT29 and SW480 colorectal adenocarcinoma cells  
 358    ( $p < 0.0001$ ,  $n = 4$ ).

359

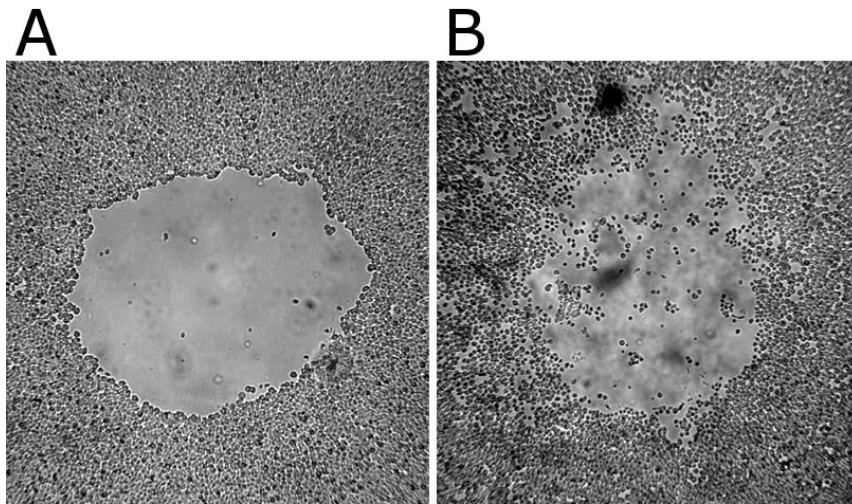

**Supplementary Figure 2: Examples of high and low-quality wounds.** Images of cultured HT29 cells in two wells of a 96-well plate, immediately after wounding. (A) A high-quality wound, with a clean wound area and well-defined border, in a uniform background of cells grown to near 100% confluence. (B) A low-quality wound (inadequate for further analysis) littered with cellular debris, ragged borders, and gaps in the cell monolayer, due to lack of confluency as well as inadequate contact with the suction p10 tip onto the well floor.
